# Supplementary material for: Unsupervised Bayesian Ising Approximation for decoding neural activity and other biological dictionaries
Source: eLife journal article supplement (doi:10.7554/elife.68192), 2022-03-22
Supplement: supp [file elife_poa_e68192_Figure_5_source_data_1.xls]

## Sheet: set1_pitch
{14, 17}	67	42.3998	0.045092	1	N/A
{14, 17, 18}	40	17.5764	0.0443945	1	N/A

## Sheet: set4_pitch
{9, 12}	12	3.95455	0.0431041	1	N/A
{7, 11}	14	5.50649	0.0477283	0	N/A

## Sheet: set7_pitch
{11}	130	110.5	0.123868	1	N/A
{3, 5}	73	58.9198	0.0711957	1	N/A
{4, 11}	70	53.4935	0.0984966	1	N/A
{5, 10}	74	52.4675	0.152555	1	N/A
{7, 8}	13	53.8974	0.0912277	1	N/A
{9, 11}	91	58.9227	0.316866	1	N/A
{9, 14}	59	42.3923	0.0917851	1	N/A
{1, 3, 9}	60	46.392	0.100503	1	N/A
{2, 4, 9}	61	47.24	0.113445	1	N/A
{2, 9, 11}	49	31.1643	0.117432	1	N/A
{2, 9, 14}	38	22.4214	0.0815029	1	N/A
{3, 5, 10}	45	26.3096	0.109809	1	N/A
{3, 9, 11}	45	29.5465	0.0872368	1	N/A
{4, 7, 11}	33	19.0938	0.0607283	1	N/A
{4, 9, 11}	50	28.5247	0.149407	1	N/A
{5, 8, 10}	42	22.8977	0.116873	1	N/A
{7, 9, 11}	41	21.0317	0.11856	1	N/A
{8, 10, 15}	29	15.2001	0.0592273	1	N/A
{1, 3, 5, 10}	30	13.1928	0.0817191	1	N/A
{2, 4, 7, 9}	30	16.8617	0.0693279	1	N/A
{2, 4, 9, 11}	29	15.0868	0.0672346	1	N/A
{4, 7, 9, 11}	28	10.1815	0.0873346	1	N/A
{1, 3}	109	87.0007	0.197399	0	N/A
{3, 13}	53	38.6113	0.0600931	0	N/A
{4, 5}	27	56.8822	0.0606806	0	N/A
{4, 7}	75	59.7868	0.107703	0	N/A
{5, 6}	11	33.7897	0.0584526	0	N/A
{9, 10}	29	82.3851	0.0967518	0	N/A
{11, 12}	2	27.7847	0.0861588	0	N/A
{1, 3, 6}	38	25.019	0.0553856	0	N/A
{1, 3, 8}	54	37.9685	0.117155	0	N/A
{2, 4, 7}	45	31.6214	0.0793268	0	N/A
{3, 5, 8}	41	25.7136	0.0850187	0	N/A
{3, 10, 13}	31	17.2412	0.0567764	0	N/A
{4, 7, 12}	30	15.0331	0.064378	0	N/A

## Sheet: set8_pitch
{11}	5	14.5	0.0260554	10	24

## Sheet: set9_pitch
{2, 3}	11	22.6796	0.0751298	0	N/A
{4}	40	30.3907	0.0566512	10	21

## Sheet: set10_pitch
{18, 20}	1	16.9562	0.0523558	1	N/A
{1, 18}	25	11.8802	0.037991	0	N/A
{18, 19}	0	11.3693	0.0268913	0	N/A
{18}	49	63.9362	0.0347677	10	79

## Sheet: set11_pitch
{14, 17}	33	18.8315	0.0854942	0	N/A
{15, 18}	50	34.3003	0.0916731	0	N/A

## Sheet: set12_pitch
{2}	160	149.801	0.0530482	1	N/A
{1, 4}	70	59.9179	0.051249	1	N/A
{2, 4}	74	56.3491	0.152898	1	N/A
{3, 6}	47	26.8333	0.14478	1	N/A
{1, 3, 4}	4	21.9038	0.0495054	1	N/A
{1, 3, 6}	24	11.3375	0.0550182	1	N/A
{5}	134	124.164	0.0515804	0	N/A
{2, 5}	60	49.3368	0.0670327	0	N/A

## Sheet: set14_pitch
{1}	69	59.8798	0.0210996	1	N/A
{3}	62	51.3968	0.0378423	10	41

## Sheet: set15_pitch
{15, 17, 18}	22	10.6478	0.0935084	0	N/A

[truncated: 85 more sheets: set16_pitch, set17_pitch, set18_pitch, set19_pitch, set20_pitch, set21_pitch, set22_pitch, set25_pitch, set29_pitch, set30_pitch, set31_pitch, set32_pitch, set33_pitch, set35_pitch, set36_pitch, set38_pitch, set39_pitch, set40_pitch, set44_pitch, set45_pitch …]
