# Supplementary material for: Unsupervised Bayesian Ising Approximation for decoding neural activity and other biological dictionaries
Source: eLife journal article supplement (doi:10.7554/elife.68192), 2022-03-22
Supplement: supp [file elife_poa_e68192_Figure_6_source_data_1.xls]

## Sheet: set5_pitch_perc80-100
{13, 14}	4	16.3079	0.102351

## Sheet: set6_pitch_perc30-50
{7}	16	9.67153	0.0253186

## Sheet: set6_pitch_perc40-60
{7}	19	9.85401	0.0620041
{7, 8}	7	1.43854	0.0249382

## Sheet: set6_pitch_perc50-70
{7}	16	9.85401	0.0238073

## Sheet: set6_pitch_perc70-90
{7}	3	9.85401	0.0327831

## Sheet: set6_pitch_perc80-100
{9}	14	7.68613	0.0281584

## Sheet: set7_pitch_perc40-60
{9, 11}	41	23.501	0.0957756

## Sheet: set7_pitch_perc50-70
{9, 11}	44	23.501	0.125067

## Sheet: set7_pitch_perc60-80
{8, 10}	40	26.6977	0.0672942

## Sheet: set8_pitch_perc0-20
{2}	24	16.3526	0.0145085

[truncated: 203 more sheets: set8_pitch_perc10-30, set8_pitch_perc20-40, set8_pitch_perc80-100, set9_pitch_perc0-20, set9_pitch_perc80-100, set10_pitch_perc80-100, set11_pitch_perc40-60, set11_pitch_perc70-90, set12_pitch_perc0-20, set12_pitch_perc10-30, set12_pitch_perc20-40, set12_pitch_perc30-50, set12_pitch_perc40-60, set12_pitch_perc50-70, set12_pitch_perc60-80, set12_pitch_perc80-100, set14_pitch_perc50-70, set14_pitch_perc70-90, set16_pitch_perc0-20, set16_pitch_perc10-30 …]
