# Supplementary material for: Unsupervised Bayesian Ising Approximation for decoding neural activity and other biological dictionaries
Source: eLife journal article supplement (doi:10.7554/elife.68192), 2022-03-22
Supplement: supp [file elife_poa_e68192_Figure_6_source_data_2.xls]

## Sheet: set3_pitch_tertile1
{10}	20	30.2105	0.13508

## Sheet: set4_pitch_tertile3
{4, 8}	11	3.10847	0.0424372
{8, 14}	10	2.60097	0.0375861

## Sheet: set5_pitch_tertile3
{13, 14}	14	27.1798	0.0915886

## Sheet: set6_pitch_tertile2
{7}	30	16.4234	0.139846
{9}	4	12.8102	0.0586395
{7, 8}	10	2.39757	0.0462931

## Sheet: set6_pitch_tertile3
{7}	7	16.6058	0.066938
{9}	21	12.9526	0.0463925
{10}	2	8.96715	0.0344874

## Sheet: set7_pitch_tertile1
{1, 3}	80	57.8329	0.168885
{3, 8}	64	50.3329	0.0940677
{1, 3, 8}	40	25.2392	0.0868535
{1, 3, 6}	33	16.6311	0.0769521
{9, 10}	18	54.7647	0.0744772
{3, 6}	48	33.1664	0.069355

## Sheet: set7_pitch_tertile2
{9, 11}	62	39.1683	0.184825
{8, 10}	61	44.821	0.132012
{7, 9}	59	43.7763	0.105286
{4, 7, 9}	35	21.1923	0.0781187
{7, 9, 11}	29	13.9806	0.0725671
{2, 9, 11}	34	20.7162	0.0712752
{4, 5}	12	37.8119	0.0675907

## Sheet: set7_pitch_tertile3
{5, 10}	54	34.8772	0.114329
{1, 3, 5, 10}	28	8.76978	0.105202
{3, 5, 10}	35	17.489	0.0934538
{1, 3, 10}	41	25.8242	0.0913272
{5, 8}	50	34.0871	0.088227
{2, 4, 9}	44	31.4023	0.087624
{3, 10}	65	51.4996	0.0862483
{1, 3, 9}	44	30.8386	0.0828301
{3, 5}	55	39.1663	0.0749047
{1, 5, 10}	33	17.489	0.0747559
{9, 11}	52	39.1683	0.0712872
{2, 5, 8}	32	18.0287	0.0706802
{4, 11}	49	35.5593	0.0696516
{9, 14}	42	28.1799	0.0662848
{5, 12}	35	19.6396	0.0626279
{5}	94	78.1069	0.0625264
{1, 3, 5}	34	19.6398	0.0618847

## Sheet: set8_pitch_tertile1
{4}	36	26.5896	0.0213582

## Sheet: set8_pitch_tertile3
{11}	2	9.63873	0.0167318

[truncated: 163 more sheets: set9_pitch_tertile1, set9_pitch_tertile3, set10_pitch_tertile1, set10_pitch_tertile2, set10_pitch_tertile3, set11_pitch_tertile2, set11_pitch_tertile3, set12_pitch_tertile1, set12_pitch_tertile2, set12_pitch_tertile3, set14_pitch_tertile1, set14_pitch_tertile3, set16_pitch_tertile1, set16_pitch_tertile2, set16_pitch_tertile3, set18_pitch_tertile1, set19_pitch_tertile1, set19_pitch_tertile3, set20_pitch_tertile1, set20_pitch_tertile2 …]
